# Supplementary figures and images for: Malaria parasites release vesicle subpopulations with signatures of different destinations
Source: PubMed Central journal article supplement — EMBO Rep. 2022 Jun 1;23(7):e54755. doi: 10.15252/embr.202254755 (PMC9253735; doi:10.15252/embr.202254755), 2022-06-01

1st biological repeat

2nd biological repeat

3rd biological repeat

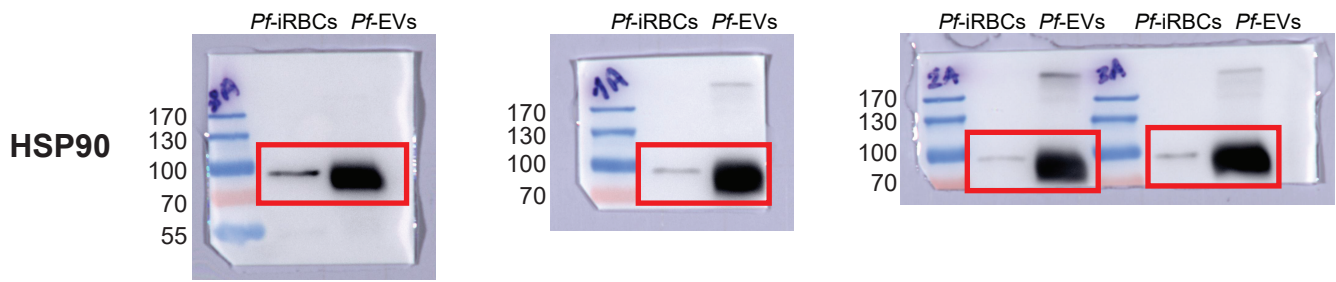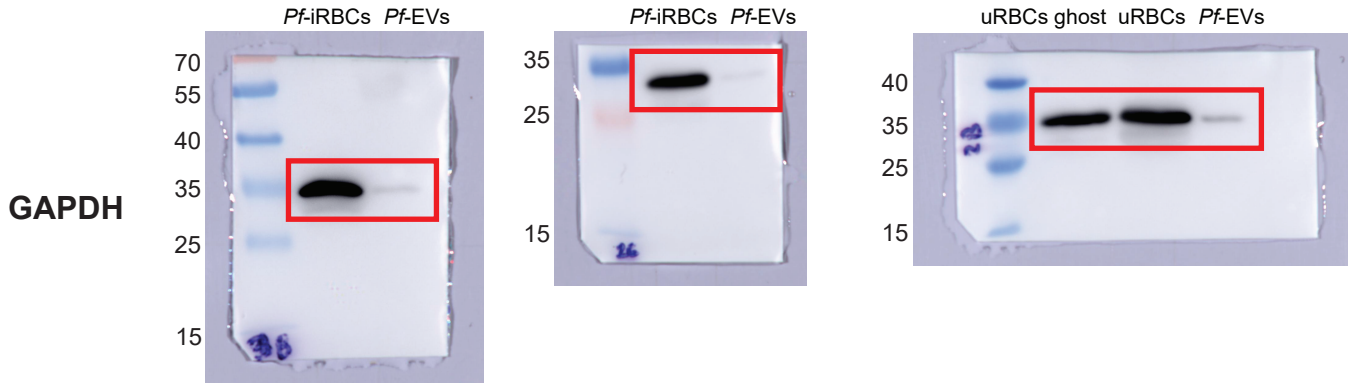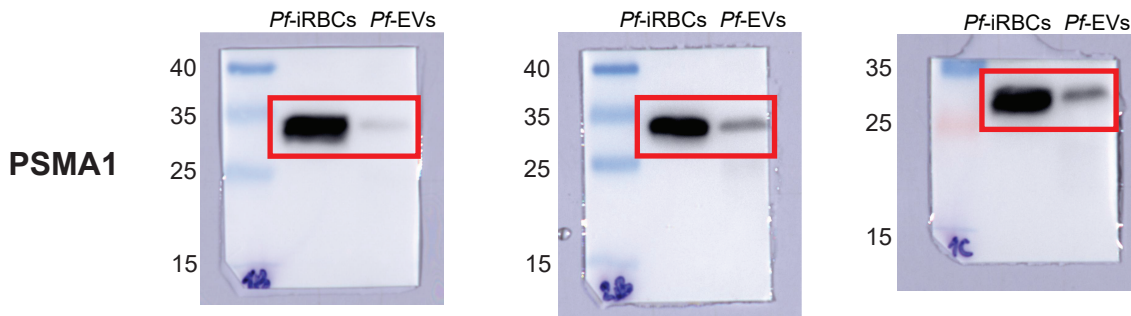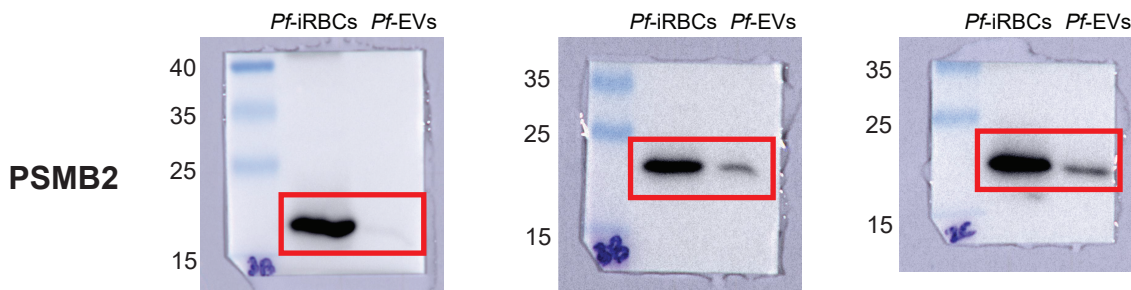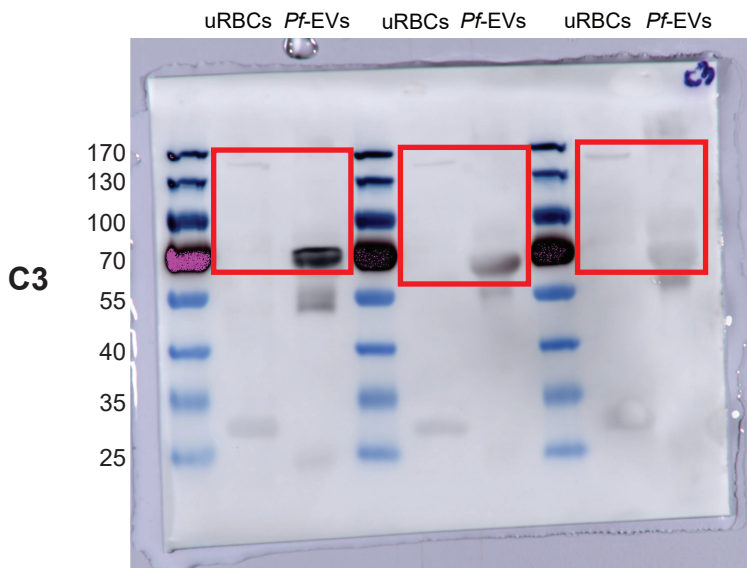

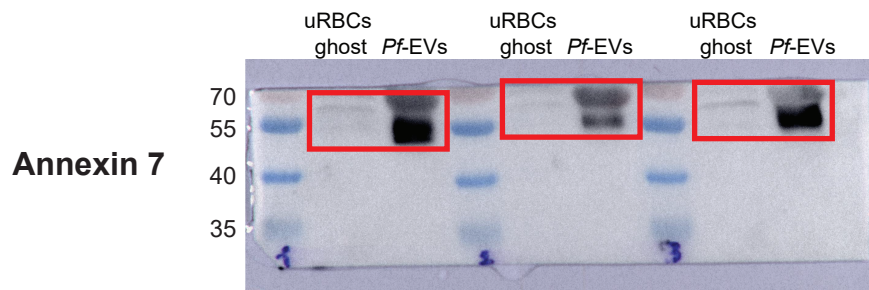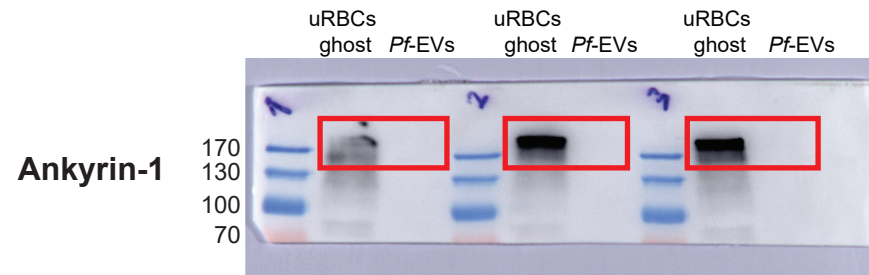

Supplement: EMBR-23-e54755-s006.pdf [file EMBR-23-e54755-s006.pdf]
